# Supplementary material
Source: HighWire-hosted journal article supplement (https://bmjopen.bmj.com/content/9/1/e023021)
Supplement: inline-supplementary-material-1 [file inline-supplementary-material-1.pdf]

## APPENDIX

**Appendix Figure 1: Composition of ethnic groups seeking care in study hospitals**

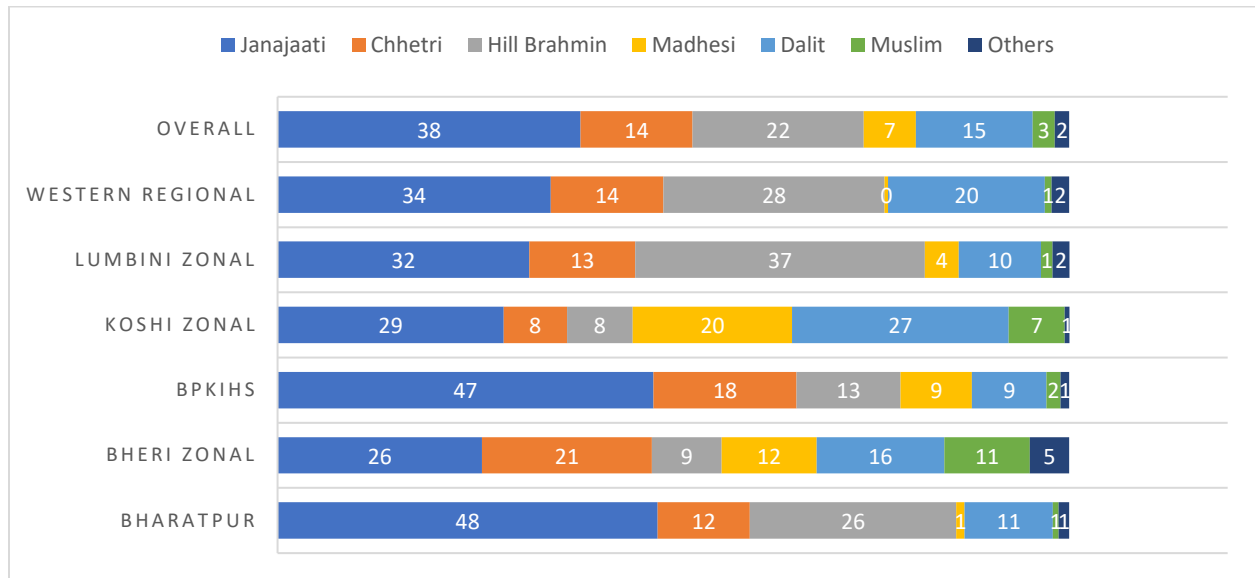

**Appendix Table 1: Descriptive statistics for study data—proportions and sample size**

|                                                                      | <b>Full Sample</b> | <b>Follow-up Sample</b> | <b>DHS sample</b> |
|----------------------------------------------------------------------|--------------------|-------------------------|-------------------|
| <b>Male birth</b>                                                    | 0.54               | 0.54                    | 0.51              |
| <b>Mother's age</b>                                                  |                    |                         |                   |
| <20                                                                  | 0.14               | 0.13                    | 0.09              |
| 20-24                                                                | 0.45               | 0.45                    | 0.37              |
| 25-29                                                                | 0.28               | 0.29                    | 0.30              |
| ≥30                                                                  | 0.13               | 0.12                    | 0.24              |
| <b>Mother's education</b>                                            |                    |                         |                   |
| Secondary or higher                                                  | 0.81               | 0.82                    | 0.48              |
| Primary                                                              | 0.10               | 0.09                    | 0.20              |
| No schooling                                                         | 0.09               | 0.09                    | 0.32              |
| <b>Parity</b>                                                        |                    |                         |                   |
| 1                                                                    | 0.58               | 0.55                    | 0.24              |
| 2                                                                    | 0.32               | 0.34                    | 0.32              |
| 3&+                                                                  | 0.10               | 0.11                    | 0.45              |
| <b>Ethnicity</b>                                                     |                    |                         |                   |
| Janajaati                                                            | 0.38               | 0.35                    |                   |
| Chhetri                                                              | 0.14               | 0.14                    |                   |
| Hill Brahmin                                                         | 0.22               | 0.23                    |                   |
| Madhesi                                                              | 0.07               | 0.07                    |                   |
| Dalit                                                                | 0.15               | 0.15                    |                   |
| Muslim                                                               | 0.03               | 0.03                    |                   |
| Others                                                               | 0.02               | 0.02                    |                   |
| <b>Region</b>                                                        |                    |                         |                   |
| Terai                                                                | 0.71               | 0.76                    |                   |
| Hill                                                                 | 0.28               | 0.24                    |                   |
| Mountain                                                             | 0.01               | 0.00                    |                   |
| <b>Number of induced abortions</b>                                   |                    |                         |                   |
| 0                                                                    | 0.96               | 0.96                    |                   |
| 1                                                                    | 0.04               | 0.04                    |                   |
| 2+                                                                   | 0.01               | 0.01                    |                   |
| <b>Conducted ultrasound during antenatal period of current birth</b> |                    | 0.93                    |                   |
| <b>Knew sex of current child</b>                                     |                    | 0.13                    |                   |
| <b>Total sample size for each data sample</b>                        | <b>75,428</b>      | <b>14,015</b>           | <b>4,047</b>      |
